# Supplementary material
Source: PubMed Central journal article supplement (PMC4058437)
Supplement: NIHMS553372-supplement-01.pdf [file NIHMS553372-supplement-01.pdf]

**Table e1****Comparison of Follow-up Pulmonary Function Test Scored Using CTCAE version 3.0 and Scored Using the RTOG SBRT Pulmonary Toxicity Scale****Percent (%) of Patients Experiencing Each Grade of Pulmonary Toxicity Following SBRT is Shown**

|                                                     |        | <b>FEV1 (% Predicted) - SBRT Pulmonary Toxicity Scale</b> |         |         |         |        |
|-----------------------------------------------------|--------|-----------------------------------------------------------|---------|---------|---------|--------|
|                                                     |        | Grade 0                                                   | Grade 1 | Grade 2 | Grade 3 | Total  |
| <b>FEV1 (% Predicted) – CTCAE version 3.0 Grade</b> |        | (n=16)                                                    | (n=21)  | (n=11)  | (n=1)   | (n=49) |
| Grade 0                                             | (n=3)  | 4.1%                                                      | 2.0%    | 0.0%    | 0.0%    | 6.1%   |
| Grade 1                                             | (n=7)  | 6.1%                                                      | 8.2%    | 0.0%    | 0.0%    | 14.3%  |
| Grade 2                                             | (n=11) | 8.2%                                                      | 8.2%    | 6.1%    | 0.0%    | 22.5%  |
| Grade 3                                             | (n=21) | 10.2%                                                     | 18.4%   | 12.2%   | 2.0%    | 42.9%  |
| Grade 4                                             | (n=7)  | 4.1%                                                      | 6.1%    | 4.1%    | 0.0%    | 14.3%  |
| Total                                               | (n=49) | 32.7%                                                     | 42.9%   | 22.4%   | 2.0%    |        |
|                                                     |        | <b>DLCO (% Predicted) - SBRT Pulmonary Toxicity Scale</b> |         |         |         |        |
|                                                     |        | Grade 0                                                   | Grade 1 | Grade 2 | Grade 3 | Total  |
| <b>DLCO (% Predicted) – CTCAE version 3.0 Grade</b> |        | (n=8)                                                     | (n=11)  | (n=18)  | (n=0)   | (n=37) |
| Grade 0                                             | (n=3)  | 2.7%                                                      | 5.4%    | 0.0%    |         | 8.1%   |
| Grade 1                                             | (n=1)  | 0.0%                                                      | 2.7%    | 0.0%    |         | 2.7%   |
| Grade 2                                             | (n=10) | 10.8%                                                     | 8.1%    | 8.1%    |         | 27.0%  |
| Grade 3                                             | (n=19) | 8.1%                                                      | 8.1%    | 35.1%   |         | 51.4%  |
| Grade 4                                             | (n=4)  | 0.0%                                                      | 5.4%    | 5.4%    |         | 10.8%  |
| Total                                               | (n=37) | 21.6%                                                     | 29.7%   | 48.6%   |         |        |
|                                                     |        | <b>FVC (% Predicted) - SBRT Pulmonary Toxicity Scale</b>  |         |         |         |        |
|                                                     |        | Grade 0                                                   | Grade 1 | Grade 2 | Grade 3 | Total  |
| <b>FVC (% Predicted) – CTCAE version 3.0 Grade</b>  |        | (n=20)                                                    | (n=20)  | (n=9)   | (n=0)   | (n=49) |
| Grade 0                                             | (n=10) | 14.3%                                                     | 4.1%    | 2.0%    |         | 20.4%  |
| Grade 1                                             | (n=11) | 8.2%                                                      | 10.2%   | 4.1%    |         | 22.4%  |
| Grade 2                                             | (n=22) | 16.3%                                                     | 18.4%   | 10.2%   |         | 44.9%  |
| Grade 3                                             | (n=6)  | 2.0%                                                      | 8.2%    | 2.0%    |         | 12.2%  |
| Total                                               | (n=49) | 40.8%                                                     | 40.8%   | 18.4%   |         |        |

**Table e2**  
**Categorized Change in Pulmonary Function Following SBRT**  
**A Decline in Pulmonary Function is Defined as a Decrease in Functioning Since Baseline**  
**of At Least 15%**

| <b>Pulmonary Function Test</b> | <b>Week 6 Post-SBRT (n=41)</b> | <b>Month 3 Post-SBRT (n=27)</b> | <b>Year 2 Post-SBRT (n=24)</b> |
|--------------------------------|--------------------------------|---------------------------------|--------------------------------|
| FVC (% Predicted)              | (n=37)                         | (n=23)                          | (n=20)                         |
| No decline                     | 81.1%                          | 87.0%                           | 85.0%                          |
| Decline                        | 18.9%                          | 13.0%                           | 15.0%                          |
| FEV1 (% Predicted)             | (n=37)                         | (n=23)                          | (n=20)                         |
| No decline                     | 81.1%                          | 73.9%                           | 75.0%                          |
| Decline                        | 18.9%                          | 26.1%                           | 25.0%                          |
| FEV1 / FVC (% Predicted)       | (n=37)                         | (n=23)                          | (n=20)                         |
| No decline                     | 78.4%                          | 73.9%                           | 70.0%                          |
| Decline                        | 21.6%                          | 26.1%                           | 30.0%                          |
| RV (% Predicted)               | (n=25)                         | (n=12)                          | (n=8)                          |
| No decline                     | 72.0%                          | 100.0%                          | 87.5%                          |
| Decline                        | 28.0%                          | 0.0%                            | 12.5%                          |
| TLC (% Predicted)              | (n=25)                         | (n=12)                          | (n=8)                          |
| No decline                     | 80.0%                          | 91.7%                           | 87.5%                          |
| Decline                        | 20.0%                          | 8.3%                            | 12.5%                          |
| DLCO (% Predicted)             | (n=29)                         | (n=17)                          | (n=13)                         |
| No decline                     | 72.4%                          | 58.8%                           | 100.0%                         |
| Decline                        | 27.6%                          | 41.2%                           | 0.0%                           |
| PaCO2                          | (n=25)                         | (n=14)                          | (n=7)                          |
| No decline                     | 96.0%                          | 85.7%                           | 100.0%                         |
| Decline                        | 4.0%                           | 14.3%                           | 0.0%                           |
| PaO2                           | (n=25)                         | (n=14)                          | (n=7)                          |
| No decline                     | 96.0%                          | 85.7%                           | 100.0%                         |
| Decline                        | 4.0%                           | 14.3%                           | 0.0%                           |
| SaO2                           | (n=24)                         | (n=12)                          | (n=8)                          |
| No decline                     | 100.0%                         | 100.0%                          | 100.0%                         |

**Table e3**  
**Treatment-Related Pulmonary Toxicity**  
**(n=55)**

| Category                                 | Grade     |           |          |          |          |
|------------------------------------------|-----------|-----------|----------|----------|----------|
| Term                                     | 1         | 2         | 3        | 4        | 5        |
| <b>PULMONARY/UPPER<br/>RESPIRATORY</b>   | <b>11</b> | <b>13</b> | <b>8</b> | <b>1</b> | <b>0</b> |
| Atelectasis                              | 1         | 2         | 0        | 0        | 0        |
| Cough                                    | 10        | 3         | 2        | 0        | 0        |
| Dyspnea                                  | 6         | 9         | 2        | 0        | 0        |
| Forced expiratory volume                 | 4         | 0         | 2        | 0        | 0        |
| Hypoxia                                  | 0         | 1         | 2        | 0        | 0        |
| Laryngeal edema                          | 0         | 2         | 0        | 0        | 0        |
| Pleural effusion                         | 4         | 1         | 0        | 0        | 0        |
| Pneumonitis NOS                          | 4         | 3         | 2        | 0        | 0        |
| Pulmonary fibrosis                       | 1         | 1         | 0        | 0        | 0        |
| Pulmonary function test NOS<br>decreased | 0         | 0         | 3        | 1        | 0        |
| Pulmonary/upper respiratory -<br>Other   | 1         | 5         | 1        | 0        | 0        |
| Tracheal stenosis                        | 0         | 1         | 0        | 0        | 0        |

Includes adverse events where relationship to protocol treatment is missing.  
 Adverse events were graded with CTCAE version 3.0.

**Table e4**  
**Logistic Regression Models**  
**Toxicities: Pleural Effusion, Pneumonitis**  
**Baseline Pulmonary Function Tests**

| <b>Pulmonary Function Test</b> | <b>Any Pleural Effusion Toxicity</b> |                    |                | <b>Any Pneumonitis Toxicity</b> |                    |                |
|--------------------------------|--------------------------------------|--------------------|----------------|---------------------------------|--------------------|----------------|
|                                | <b>Events/ Total</b>                 | <b>OR (95% CI)</b> | <b>p-value</b> | <b>Events/ Total</b>            | <b>OR (95% CI)</b> | <b>p-value</b> |
| FVC (Actual)                   | 5 / 51                               | 0.90 (0.23, 3.53)  | 0.8835         | 8 / 51                          | 1.38 (0.49, 3.91)  | 0.5469         |
| FVC (% Predicted)              | 5 / 51                               | 1.01 (0.98, 1.05)  | 0.4694         | 8 / 51                          | 1.00 (0.97, 1.04)  | 0.9115         |
| FEV1 (Actual)                  | 5 / 51                               | 1.27 (0.32, 5.04)  | 0.7366         | 8 / 51                          | 1.92 (0.64, 5.75)  | 0.2496         |
| FEV1 (% Predicted)             | 5 / 51                               | 1.01 (0.99, 1.03)  | 0.4108         | 8 / 51                          | 1.01 (0.98, 1.03)  | 0.5907         |
| FEV1 / FVC (Actual)            | 5 / 51                               | NA - unstable      | --             | 8 / 51                          | NA - unstable      | --             |
| FEV1 / FVC (% Pred.)           | 5 / 51                               | NA - unstable      | --             | 8 / 51                          | NA - unstable      | --             |
| RV (Actual)                    | 5 / 39                               | 0.31 (0.09, 1.08)  | 0.0358         | 6 / 39                          | 0.60 (0.24, 1.53)  | 0.2699         |
| RV (% Predicted)               | 5 / 39                               | 0.98 (0.95, 1.01)  | 0.0754         | 6 / 39                          | 1.00 (0.99, 1.02)  | 0.8533         |
| TLC (Actual)                   | 5 / 39                               | 0.67 (0.30, 1.50)  | 0.3056         | 6 / 39                          | 1.06 (0.57, 2.00)  | 0.8493         |
| TLC (% Predicted)              | 5 / 39                               | 0.99 (0.94, 1.04)  | 0.6240         | 6 / 39                          | 0.99 (0.95, 1.04)  | 0.8020         |
| DLCO (Actual)                  | 4 / 42                               | 0.73 (0.50, 1.07)  | 0.0680         | 6 / 42                          | 0.96 (0.75, 1.23)  | 0.7638         |
| DLCO (% Predicted)             | 4 / 42                               | 1.00 (0.96, 1.03)  | 0.7968         | 6 / 42                          | 0.99 (0.95, 1.02)  | 0.4491         |
| PaCO2                          | 4 / 37                               | 0.93 (0.78, 1.11)  | 0.4072         | 3 / 37                          | 0.93 (0.76, 1.14)  | 0.4796         |
| PaO2                           | 4 / 37                               | 1.02 (0.95, 1.10)  | 0.6263         | 3 / 37                          | 0.96 (0.88, 1.06)  | 0.4452         |
| SaO2                           | 4 / 33                               | 1.00 (0.78, 1.27)  | 0.9958         | 3 / 33                          | 0.97 (0.75, 1.26)  | 0.8382         |

**Table e5**  
**Logistic Regression Models**  
**Toxicity Occurring 6 Weeks after SBRT:**  
**Any Pulmonary/Upper Respiratory Toxicity**  
**6 Week Post-SBRT Pulmonary Function Tests**

| <b>Pulmonary Function Test</b> | <b>Any Pulmonary Toxicity</b> |                    |                | <b>Any Pneumonitis Toxicity</b> |                    |                |
|--------------------------------|-------------------------------|--------------------|----------------|---------------------------------|--------------------|----------------|
|                                | <b>Events/<br/>Total</b>      | <b>OR (95% CI)</b> | <b>p-value</b> | <b>Events/<br/>Total</b>        | <b>OR (95% CI)</b> | <b>p-value</b> |
| FVC (Actual)                   | 8 / 40                        | 1.10 (0.43, 2.82)  | 0.8434         | 3 / 40                          | 0.34 (0.05, 2.22)  | 0.2134         |
| FVC (% Predicted)              | 8 / 40                        | 0.99 (0.96, 1.02)  | 0.4980         | 3 / 40                          | 0.95 (0.89, 1.02)  | 0.1276         |
| FEV1 (Actual)                  | 8 / 40                        | 1.13 (0.28, 4.61)  | 0.8615         | 3 / 40                          | 0.06 (0.00, 2.61)  | 0.0707         |
| FEV1 (% Predicted)             | 8 / 40                        | 0.99 (0.96, 1.02)  | 0.5212         | 3 / 40                          | 0.94 (0.87, 1.02)  | 0.0668         |
| FEV1 / FVC (Actual)            | 8 / 40                        | NA - unstable      | --             | 3 / 40                          | NA - unstable      | --             |
| FEV1 / FVC (% Pred.)           | 8 / 40                        | NA - unstable      | --             | 3 / 40                          | 0.01 (0.00, 9.07)  | 0.1645         |
| RV (Actual)                    | 6 / 34                        | 1.29 (0.71, 2.32)  | 0.4127         | 2 / 34                          | 2.13 (0.92, 4.91)  | 0.0615         |
| RV (% Predicted)               | 6 / 34                        | 1.00 (0.99, 1.02)  | 0.5339         | 2 / 34                          | 1.04 (0.99, 1.09)  | 0.0058         |
| TLC (Actual)                   | 6 / 34                        | 1.39 (0.84, 2.30)  | 0.2001         | 2 / 34                          | 1.67 (0.83, 3.36)  | 0.1584         |
| TLC (% Predicted)              | 6 / 34                        | 1.00 (0.95, 1.04)  | 0.8680         | 2 / 34                          | 1.03 (0.96, 1.11)  | 0.3336         |
| DLCO (Actual)                  | 7 / 38                        | 1.07 (0.87, 1.30)  | 0.5361         | 2 / 38                          | 0.80 (0.50, 1.29)  | 0.3094         |
| DLCO (% Predicted)             | 7 / 38                        | 0.99 (0.95, 1.03)  | 0.5829         | 2 / 38                          | 0.94 (0.84, 1.05)  | 0.1847         |
| PaCO2                          | 7 / 33                        | 0.97 (0.85, 1.10)  | 0.6136         | 1 / 33                          | 1.07 (0.87, 1.31)  | 0.5544         |
| PaO2                           | 7 / 33                        | 0.99 (0.94, 1.06)  | 0.8369         | 1 / 33                          | 1.00 (0.87, 1.15)  | 0.9977         |
| SaO2                           | 6 / 31                        | 0.96 (0.77, 1.20)  | 0.7279         | 1 / 31                          | 1.11 (0.61, 2.00)  | 0.7233         |
